# Supplementary material
Source: Springer Nature journal article supplement (https://www.springermedizin.de/resource/supplementary/13030_2013_166_MOESM3_ESM.pdf/9644878)

Brinkhaus 2006 (n=298)

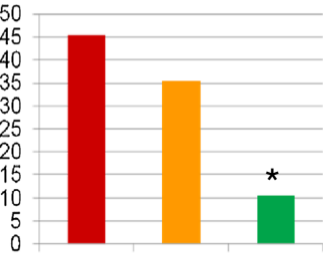

**ART**

Haake 2007 (n=1,162)

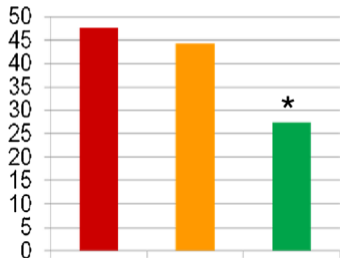

**GERAC**

Supplement: MOESM3 [file 9644878]
